# Supplementary material for: Interstitial Fluid Flow and Transport in Glioblastoma and Surrounding Parenchyma in Patients
Source: Preprints.org preprint supplement (doi:10.20944/preprints202012.0789.v1), 2020-12-31
Supplement: Supplementary file 1 [file supplementary]

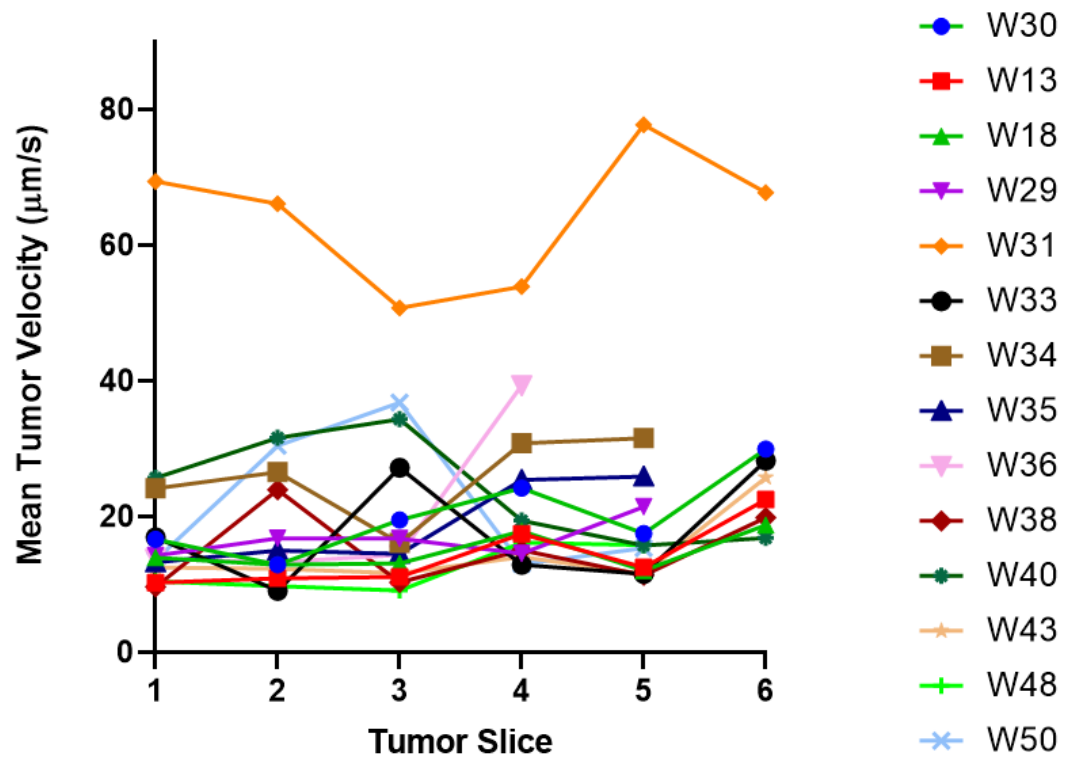

**Figure S1: Mean tumor velocity magnitude by slice through tumor** On a patient-by-patient basis, the total velocity magnitude was averaged per slice.

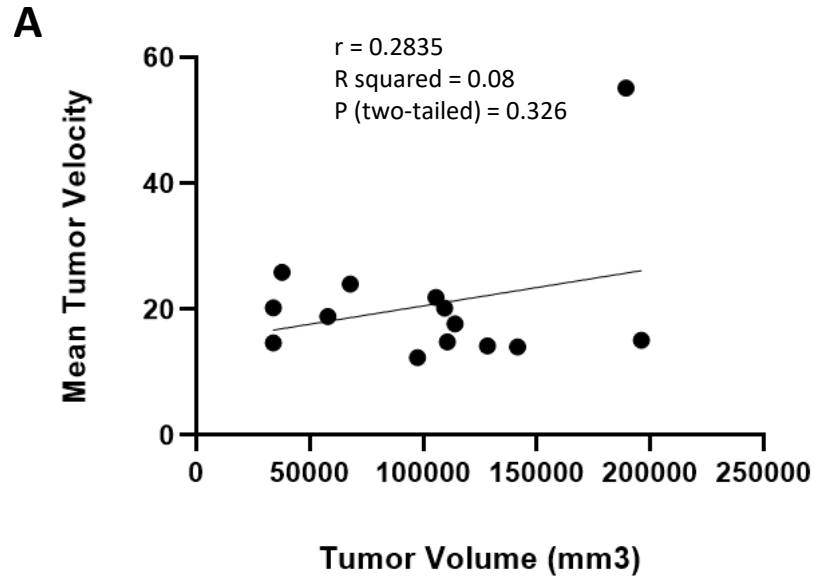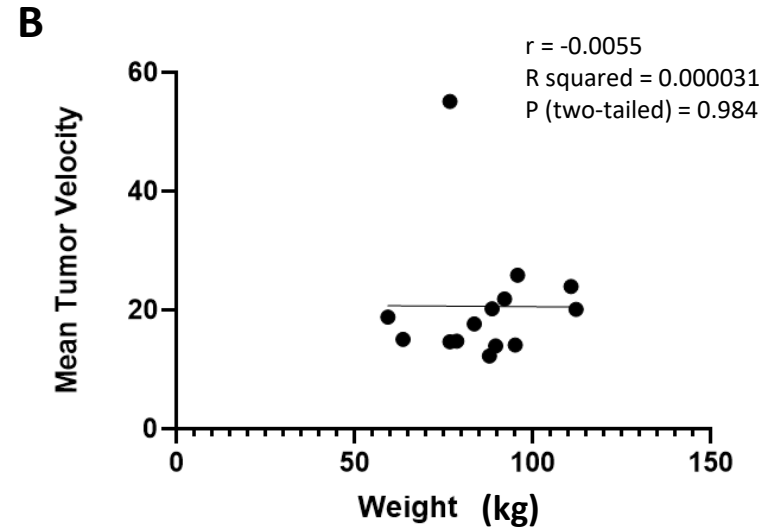

**C**

| Comparison Variable     | P-value |
|-------------------------|---------|
| Sex                     | 0.1469  |
| MGMT Methylation Status | 0.9497  |
| EGFR Amplification      | 0.329   |

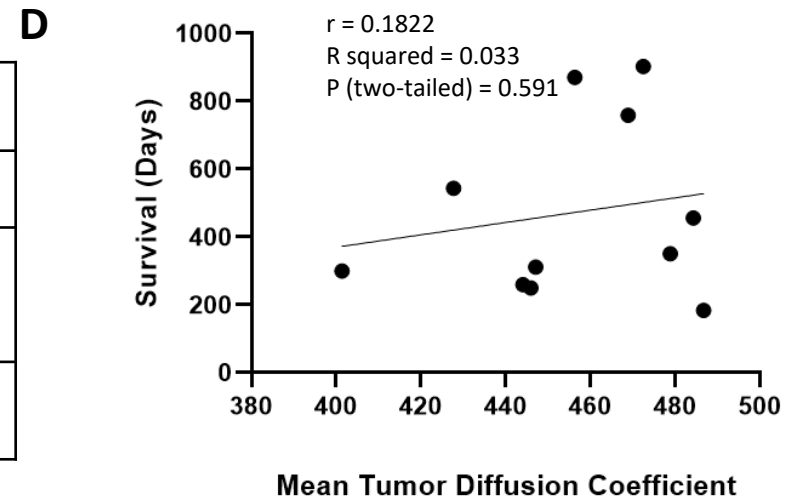

**Figure S2: Patient parameters and outcomes on IFF and Diffusion** (A) Mean tumor velocity vs calculated tumor volume from 6 slices on MRI. (B) Mean tumor velocity vs patient weight at MRI (C) Table of Mann-Whitney t-test comparisons for three reported binary (as reported) variables (D) Correlation of survival with mean tumor diffusion coefficient.
